# Supplementary material for: Chromatin remodeling in bovine embryos indicates species-specific regulation of genome activation
Source: PubMed Central journal article supplement (PMC7498599; doi:10.1038/s41467-020-18508-3), 2020-09-17
Supplement: 41467_2020_18508_MOESM1_ESM.pdf [file 41467_2020_18508_MOESM1_ESM.pdf]

Chromatin remodeling in bovine embryos indicates species-specific regulation of genome activation

Halstead et al.

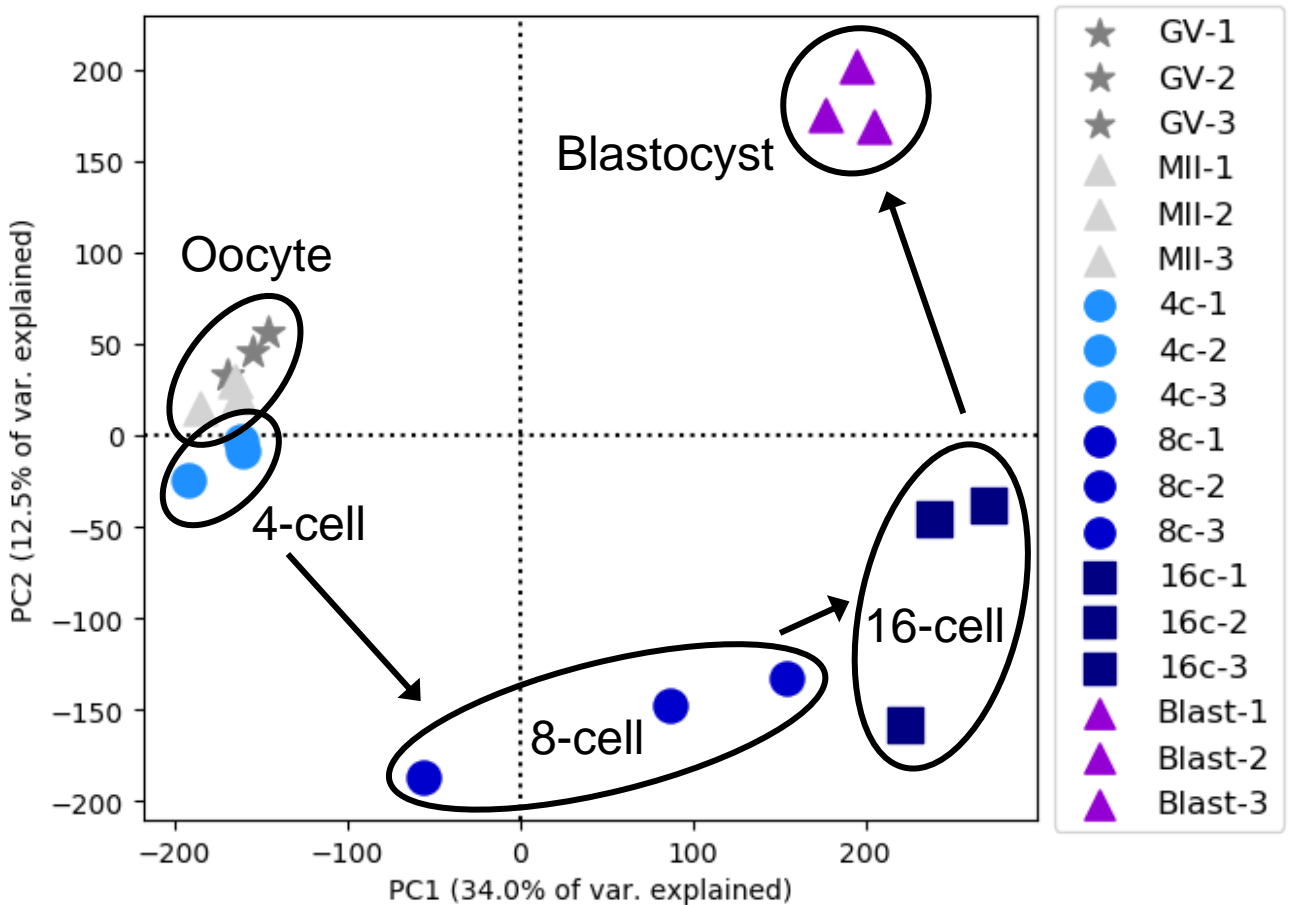

Supplementary Figure 1. Principal components analysis (PCA) of RNA-seq read depth normalized by reads per kilobase million (RPKM) in 50 bp windows covering the whole genome. Sequencing data from Graf et al (2014)<sup>1</sup>. Source data are provided as a Source Data file.

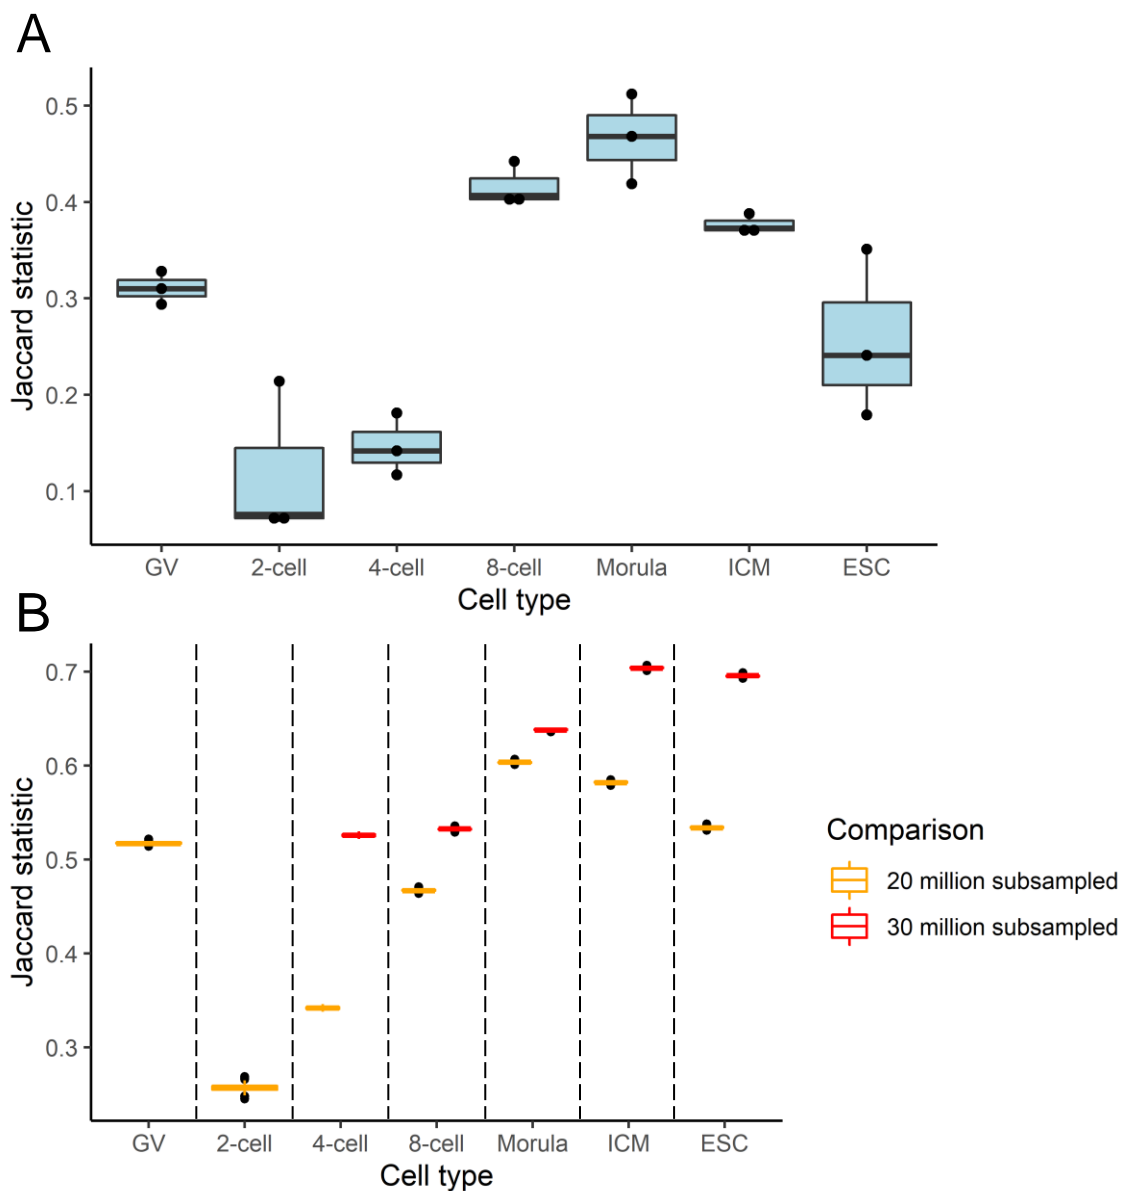

Supplementary Figure 2. Comparison of ATAC-seq peak sets. The Jaccard statistic measures overlap of peak sets, with 0 indicating no overlap, and 1 indicating complete overlap. A) Comparison of peak sets from biological replicates (n=3 biologically independent samples per developmental stage). B) Comparison of peak sets derived from random subsampling from pooled reads for each developmental stage. For each target depth (either 20 or 30 million reads), random subsampling was conducted 100 times, resulting in 100 peak sets that were compared on a pair-wise basis. Boxplots indicate the median and interquartile range (IQR), and whiskers span 1.5 times the IQR. Outliers (data points beyond whiskers) are shown as black points. Source data are provided as a Source Data file.

TF footprints in GV oocytes

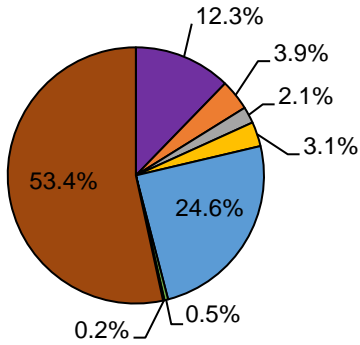

TF footprints in 2-cell embryos

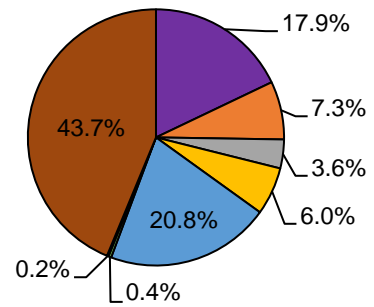

TF footprints in 4-cell embryos

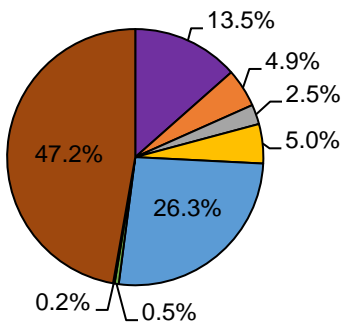

TF footprints in 8-cell embryos

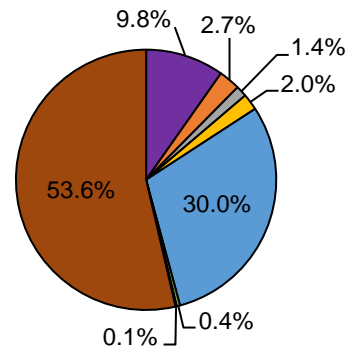

TF footprints in morula

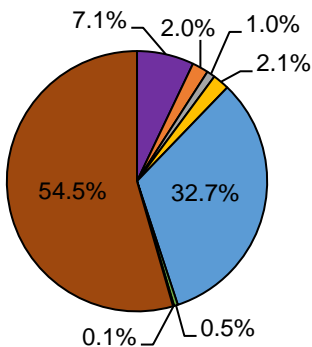

TF footprints in ICM

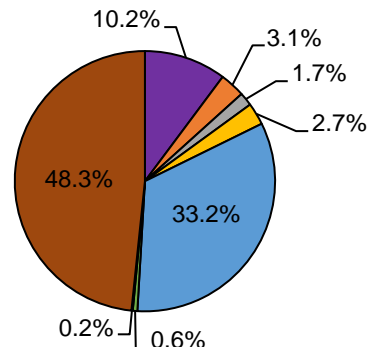

TF footprints in ESC

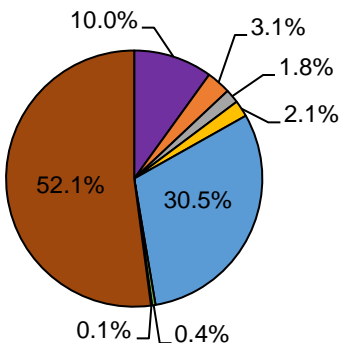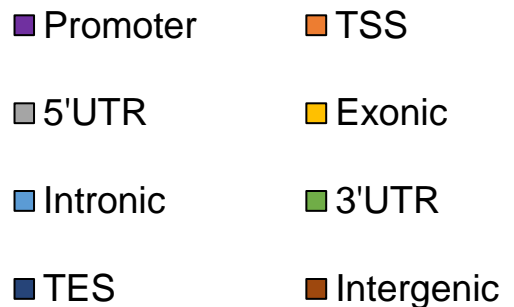

Supplementary Figure 3. Genomic distribution of TF footprints during each stage of development and in ESC. UTR: untranslated region. TES: transcription end site. Source data are provided as a Source Data file.

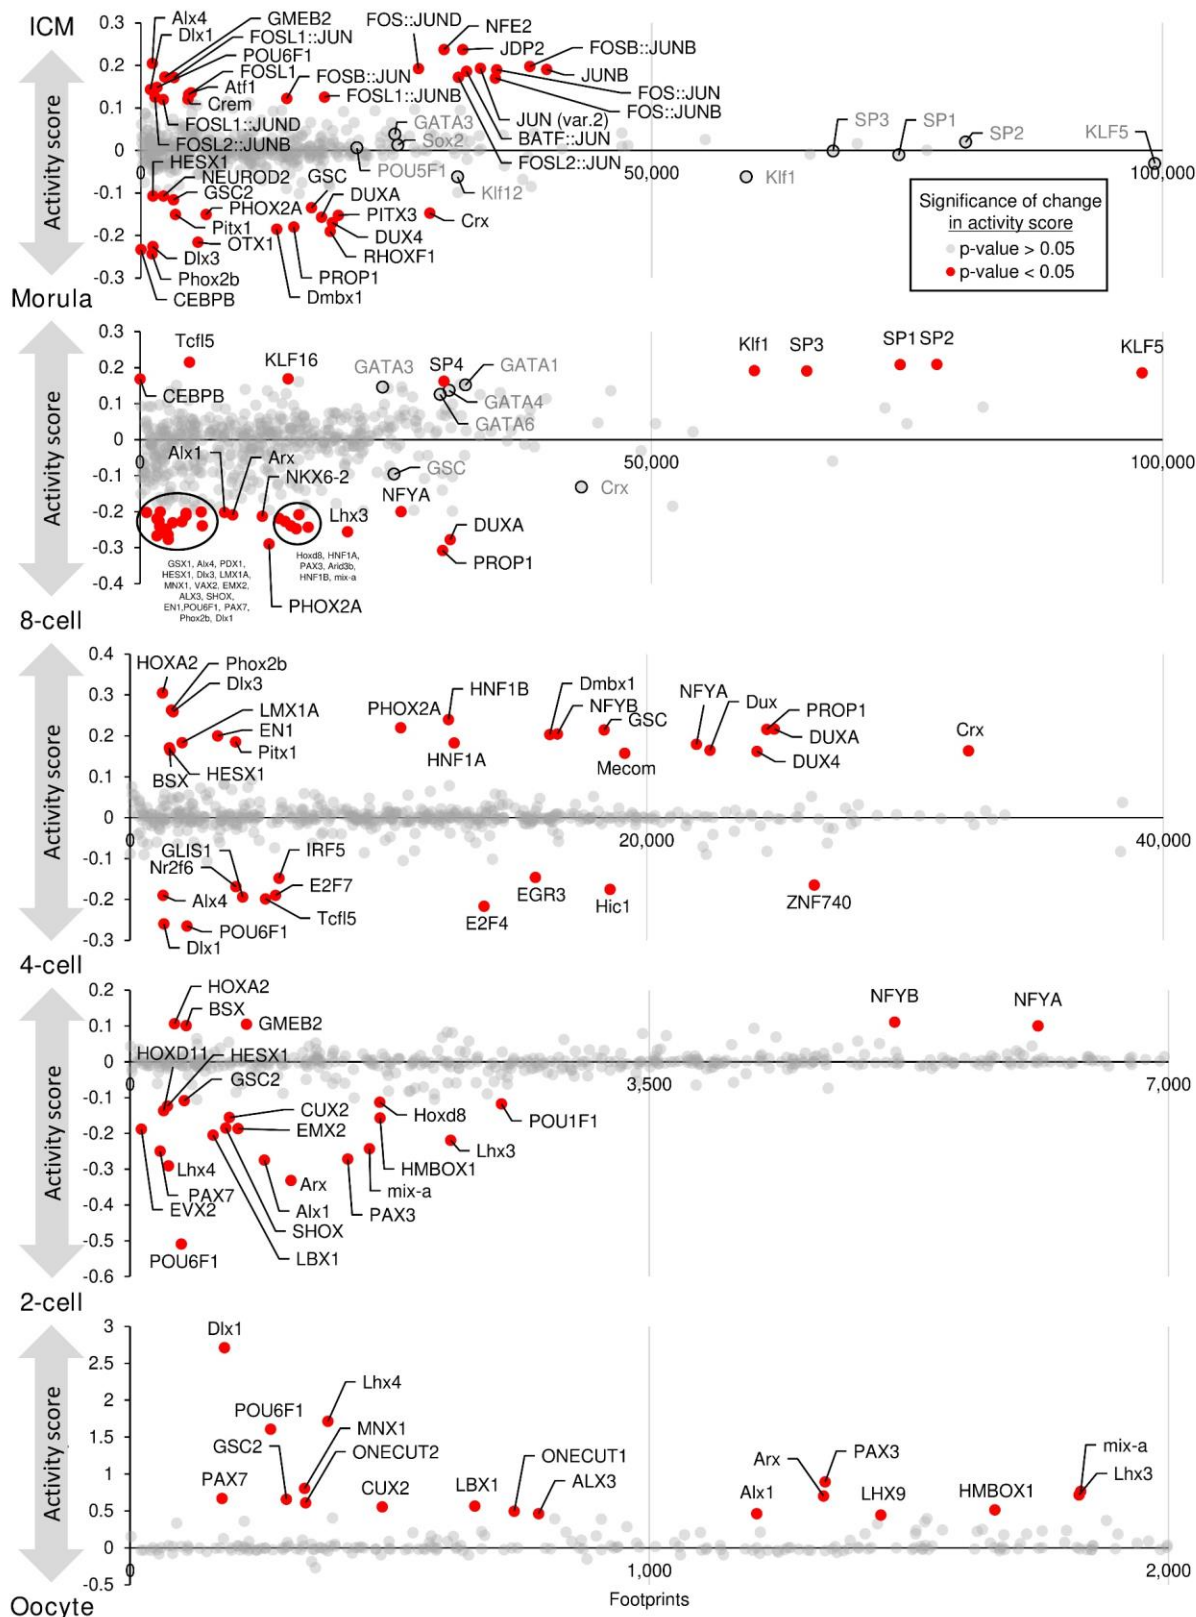

Supplementary Figure 4. Dynamics of transcription factor footprinting during preimplantation development. TF footprint abundance and intensity compared between consecutive stages of development. TFs colored in red demonstrated a significant change in activity between the two stages compared (p-value < 0.05; two-tailed t-test). Source data are provided as a Source Data file.

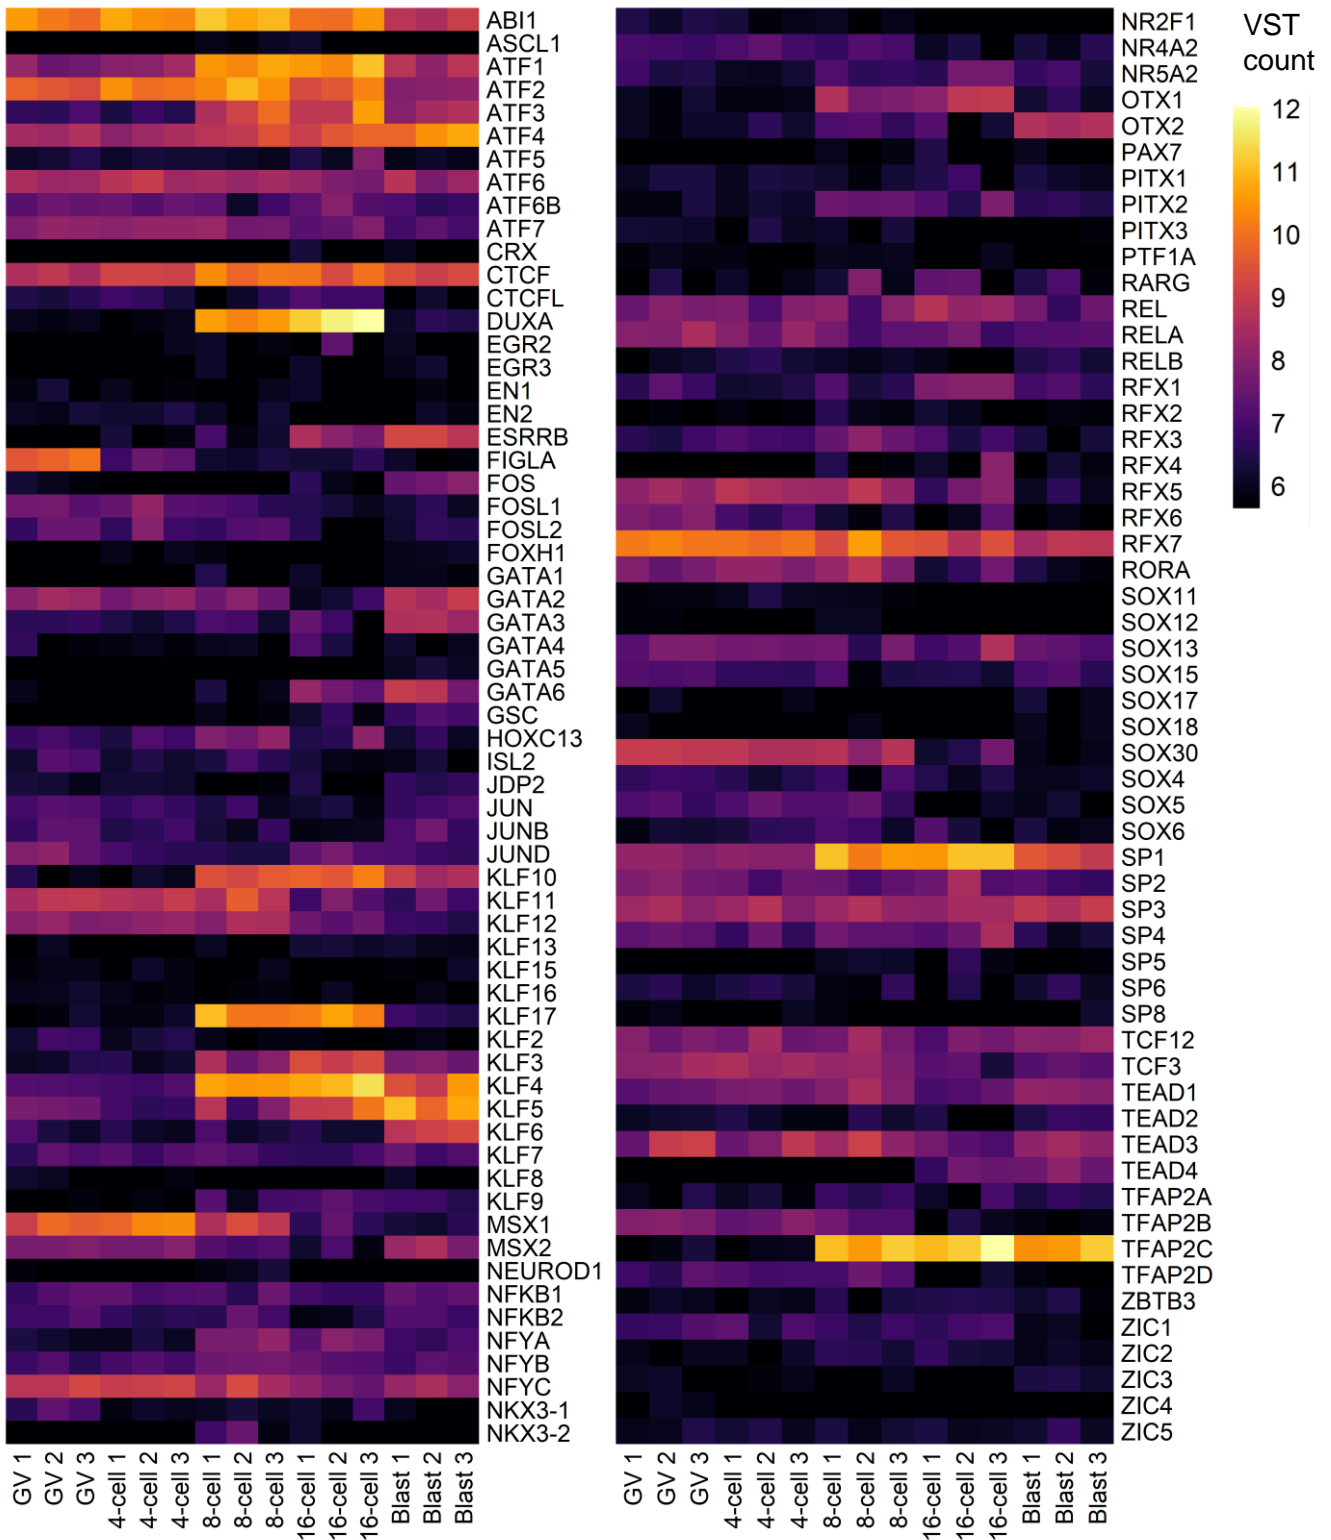

Supplementary Figure 5. Variance stabilized transformed (VST) expression counts for transcription factors with enriched binding motifs in distal open chromatin at some point during bovine preimplantation development. RNA-seq data from Graf et al (2014) <sup>1</sup>. Source data are provided as a Source Data file.

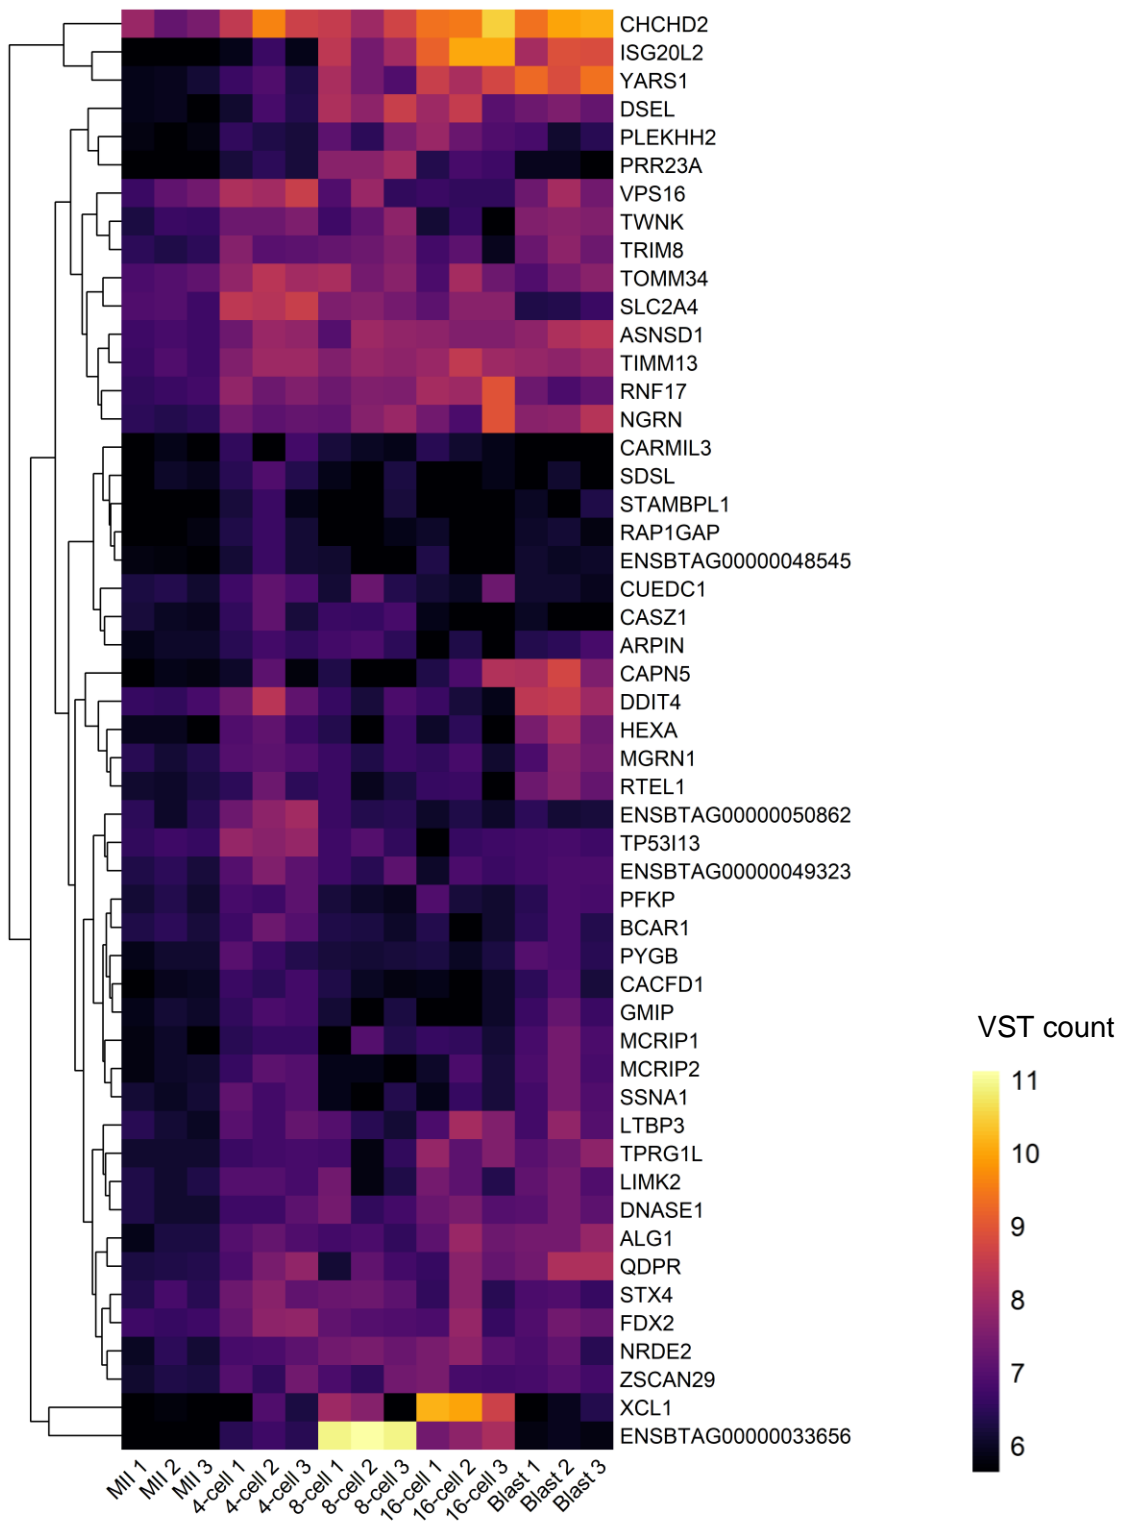

Supplementary Figure 6. Minor EGA products. VST normalized expression of genes that were differentially upregulated in 4-cell embryos relative to MII oocytes (n=62 genes; adjusted p-value < 0.05; log fold change in expression > 2). P-values derived by the Wald test and adjusted for multiple testing by the Benjamini-Hochberg method. RNA-seq data from Graf et al (2014) <sup>1</sup>. Source data are provided as a Source Data file.

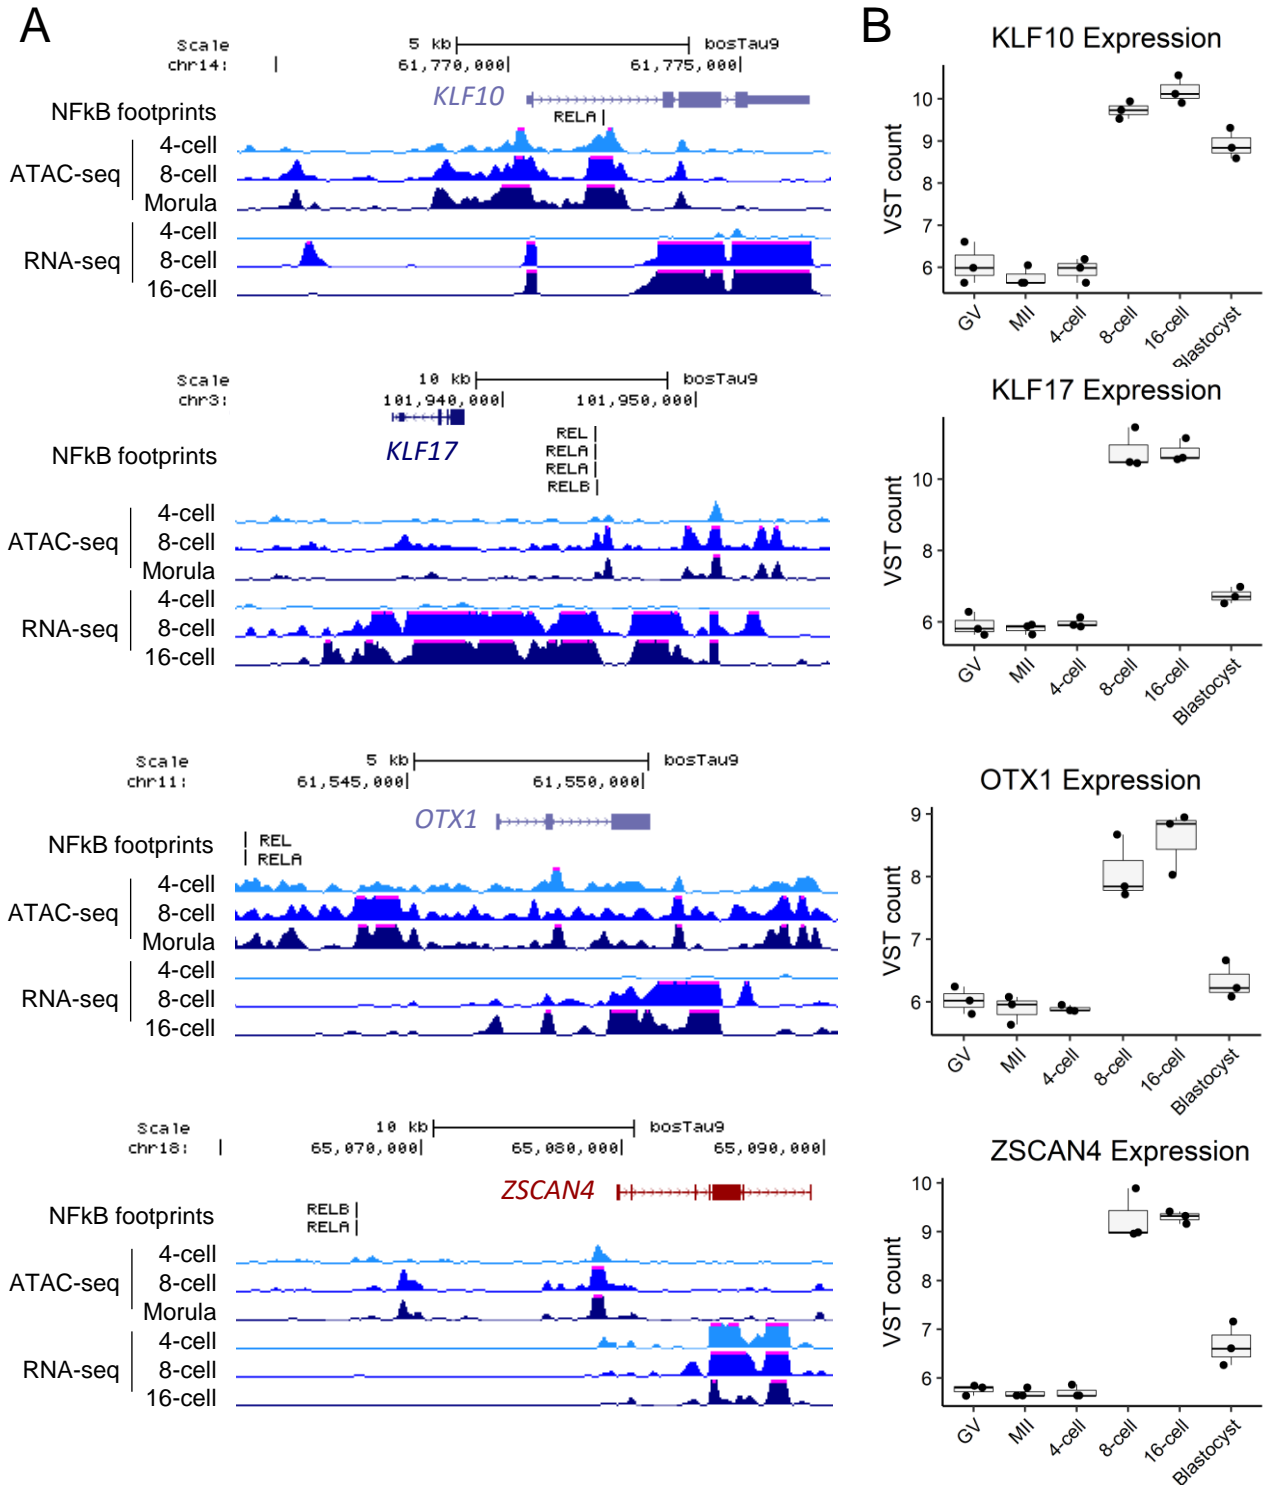

Supplementary Figure 7. Putative target genes of NFkB activation in 4-cell embryos. A) Accessibility and expression profiles of potential EGA regulators marked by NFkB factor footprints at the 4-cell stage. B) Normalized expression of the same genes in bovine oocytes and preimplantation embryos (n=3 biologically independent samples). Boxplots indicate the median and interquartile range (IQR), and whiskers span 1.5 times the IQR. RNA-seq data from Graf et al (2014) <sup>1</sup>. Source data are provided as a Source Data file.



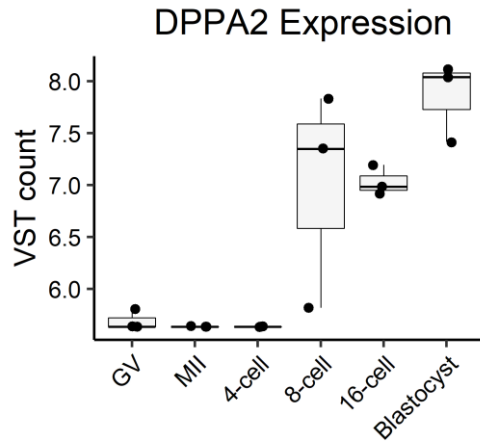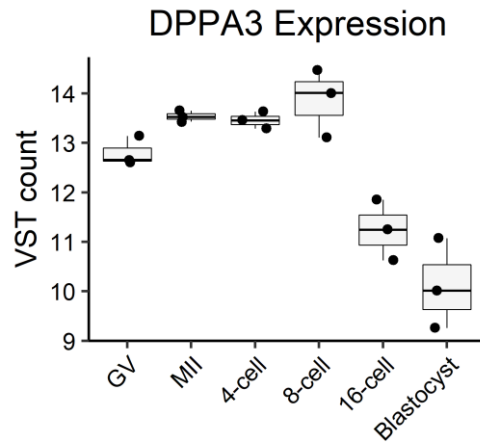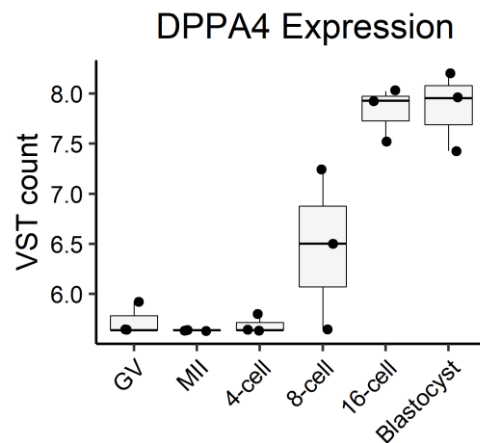

Supplementary Figure 8. VST expression profiles of DPPA genes during preimplantation development (n=3 biologically independent samples). Boxplots indicate the median and interquartile range (IQR), and whiskers span 1.5 times the IQR. RNA-seq data from Graf et al (2014) <sup>1</sup>. Source data are provided as a Source Data file.

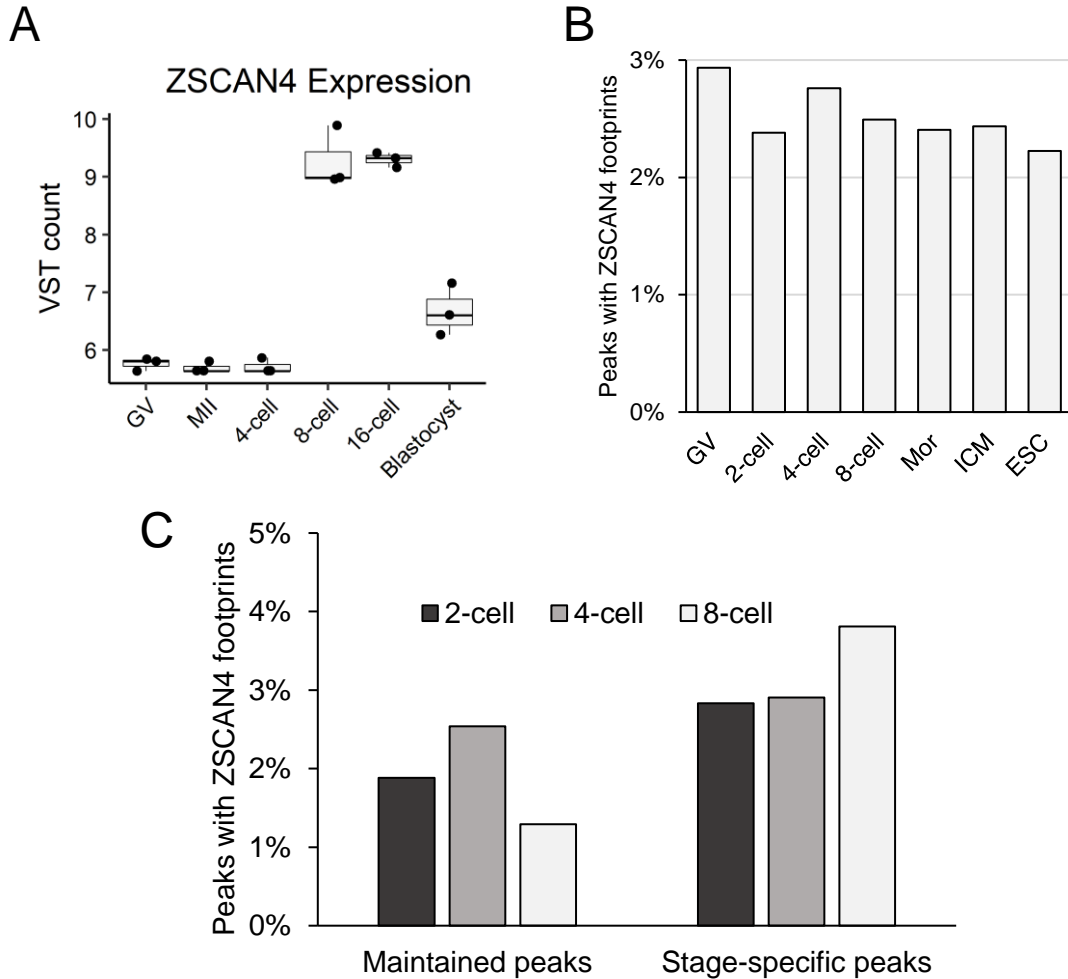

Supplementary Figure 9. A) VST expression profile of ZSCAN4 (n=3 biologically independent samples). Boxplots indicate the median and interquartile range (IQR), and whiskers span 1.5 times the IQR. B) Percent ATAC-seq peaks at each stage that contained ZSCAN4 footprints. C) ZSCAN4 footprints in stage-specific and maintained peaks at the 2-, 4-, and 8-cell stages. RNA-seq data from Graf et al (2014)<sup>1</sup>. Source data are provided as a Source Data file.

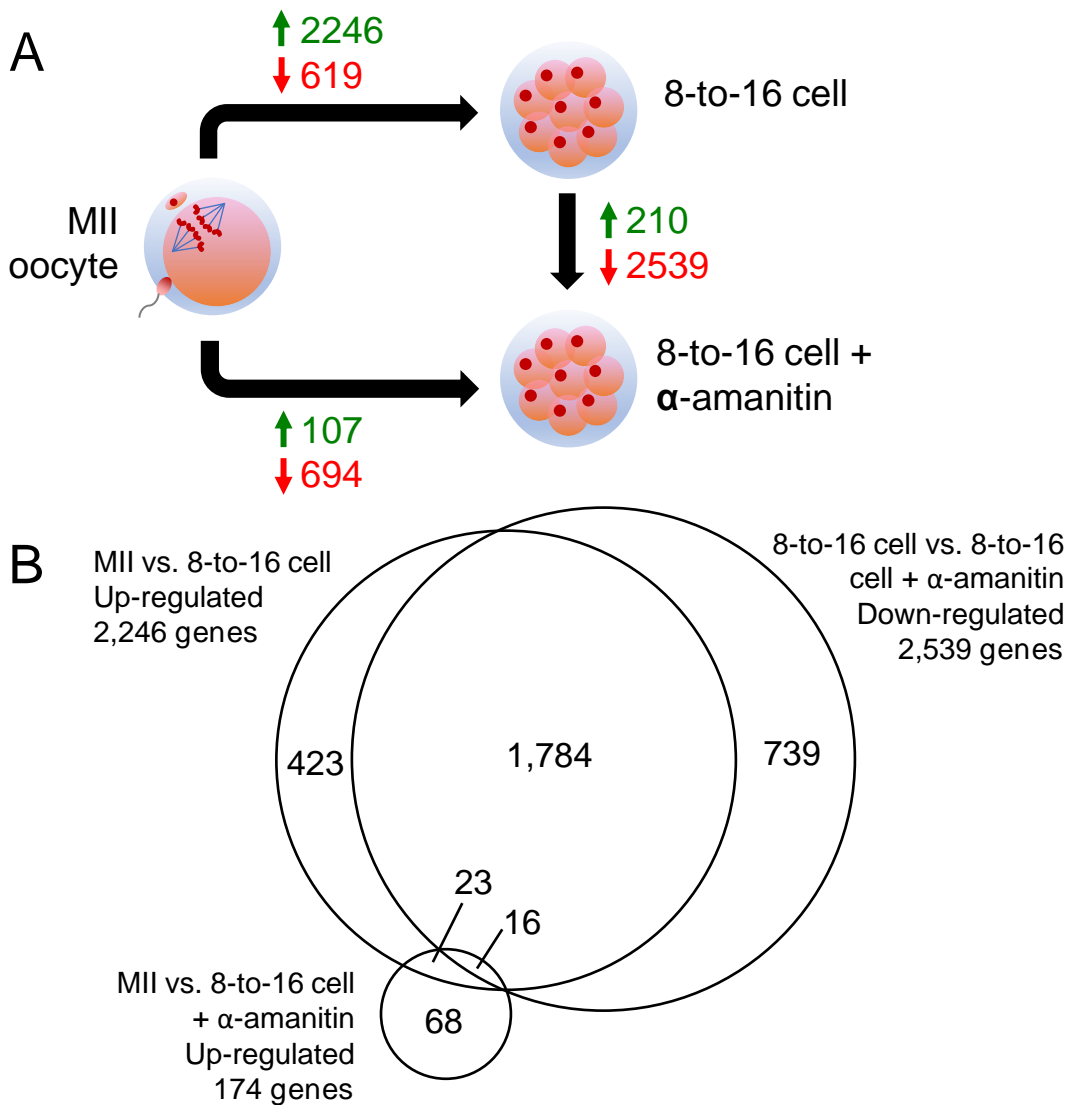

Supplementary Figure 10. Analysis of RNA-seq data from Bogliotti et al (2019)<sup>2</sup>. A) Differentially expressed genes (DEG) across developmental stages, which demonstrated an FDR < 0.05 and log fold change in expression > 2. P-values derived by the Wald test and adjusted for multiple testing by the Benjamini and Hochberg method. B) Venn diagram comparing DEG between different stages, allowing for the identification of 68 transcripts that were exclusively maternal in origin, and 1,784 transcripts that were exclusively embryonic in origin; i.e. EGA-specific genes. Source data are provided as a Source Data file.

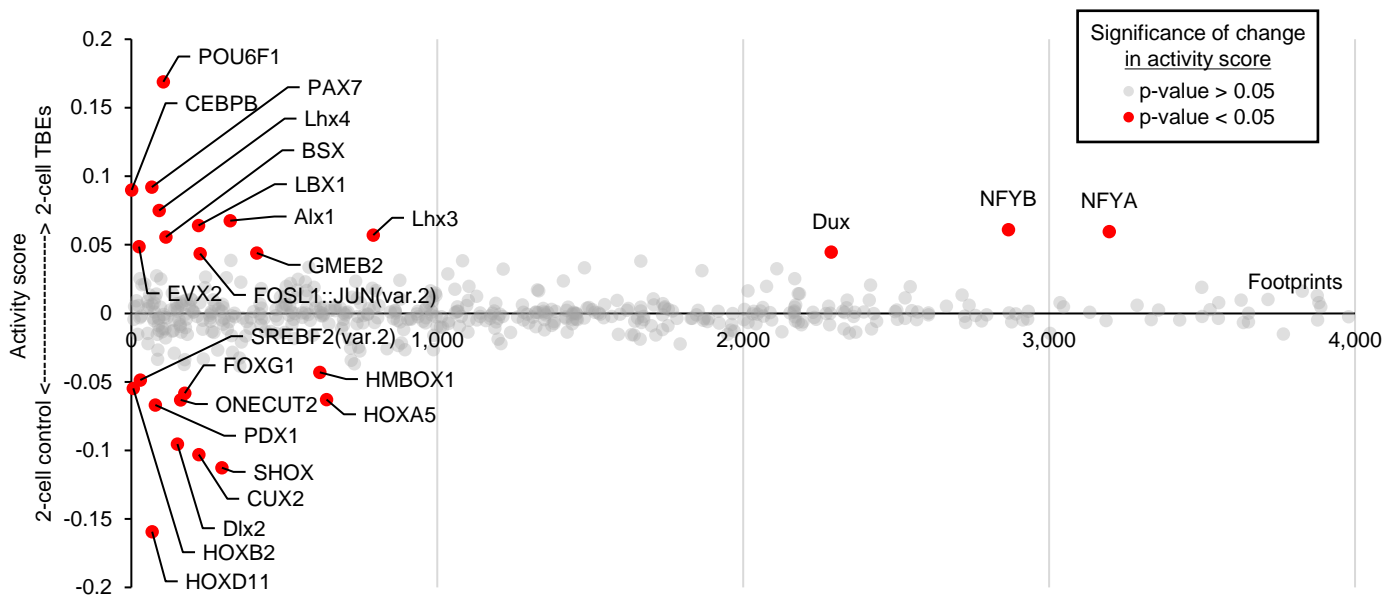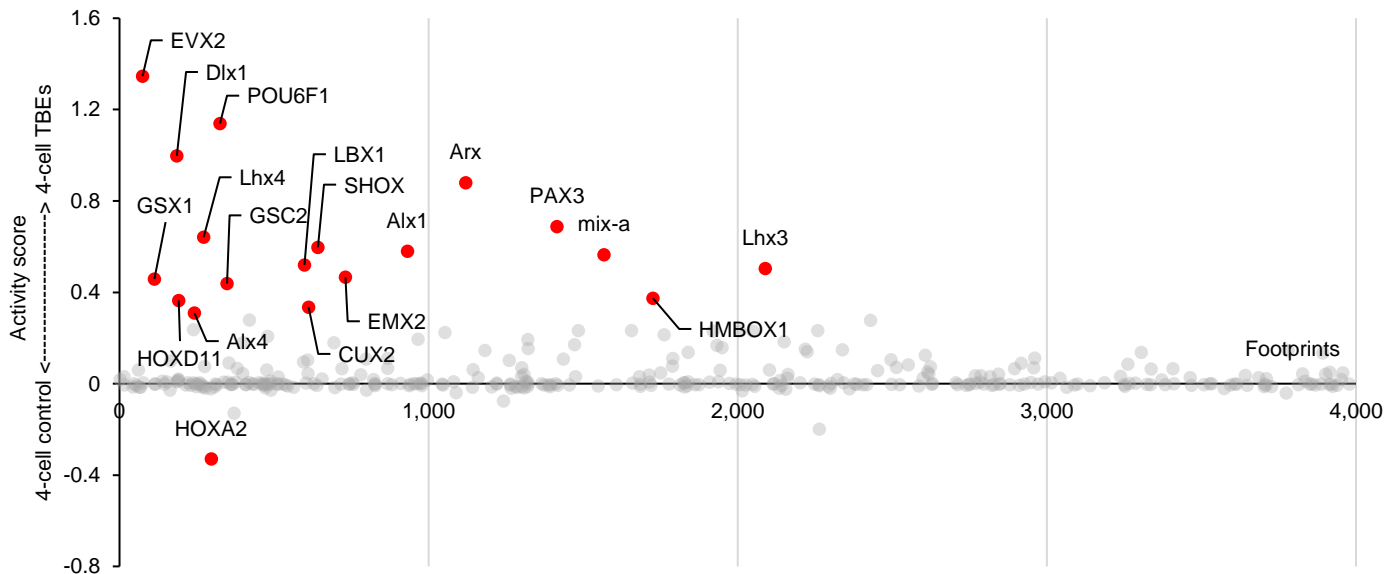

Supplementary Figure 11. Comparison of TF binding activity in control and TBE at the 2-cell and 4-cell stages. TFs colored in red demonstrated significantly increased activity ( $p$ -value  $< 0.05$ ; two-tailed  $t$ -test) in either TBE (positive activity score) or control embryos (negative activity score). Source data are provided as a Source Data file.

Developmental stage

GV 4-cell 16-cell  
 MII 8-cell Blastocyst

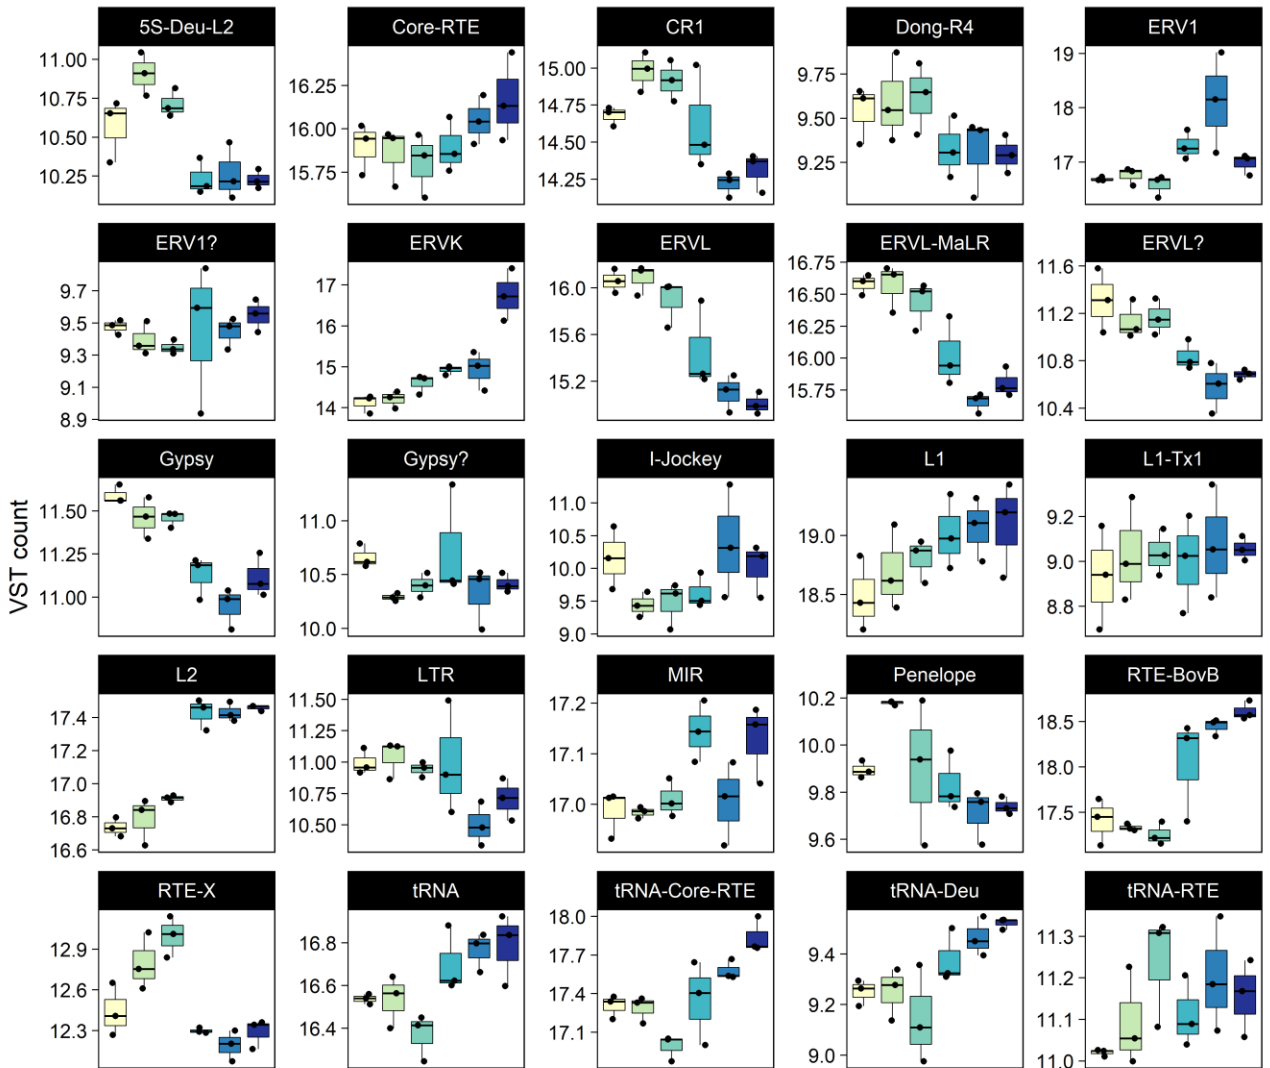

Supplementary Figure 12. Normalized expression profiles of all LTR, LINE, and SINE repeat families throughout bovine preimplantation development (n=3 biologically independent samples). Boxplots indicate the median and interquartile range (IQR), and whiskers span 1.5 times the IQR. Transcriptomic data generated for bovine oocytes and embryos by Graf et al (2014) <sup>1</sup>. Source data are provided as a Source Data file.

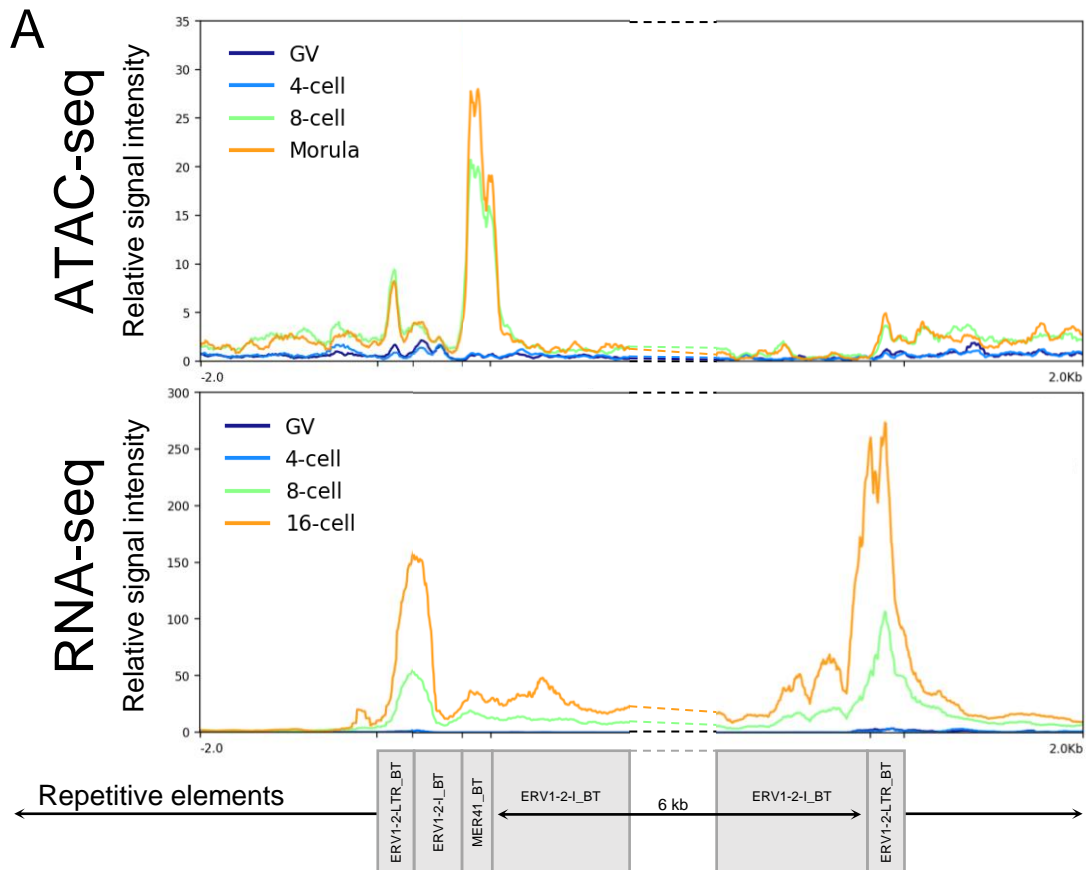

**B**

| Motif                 | P-value | Open chromatin in MER41 with motif (%) |
|-----------------------|---------|----------------------------------------|
| POU5F1-SOX2-TCF-NANOG | 1e-20   | 29.4                                   |
| POU5F1                | 1e-13   | 33.3                                   |
| LHX2                  | 1e-09   | 39.2                                   |
| NFY                   | 1e-07   | 33.3                                   |
| KLF4                  | 1e-07   | 23.5                                   |
| OTX2                  | 1e-07   | 31.4                                   |
| TEAD                  | 1e-06   | 31.4                                   |

Supplementary Figure 13. A) Average relative ATAC-seq (FPKM) and RNA-seq (RPKM) signal intensity at 57 ERV1-2-I\_BT elements flanked by ERV1-2-LTR\_BT with an internal MER41\_BT element. B) Top known motifs enriched in open chromatin at MER41\_BT elements that accompany ERV1-2-I\_BT and ERV1-2-LTR\_BT elements. Binomial test p-values reported (all FDR adjusted Q-values < 1e-4). RNA-seq data from Graf et al (2014) <sup>1</sup>.

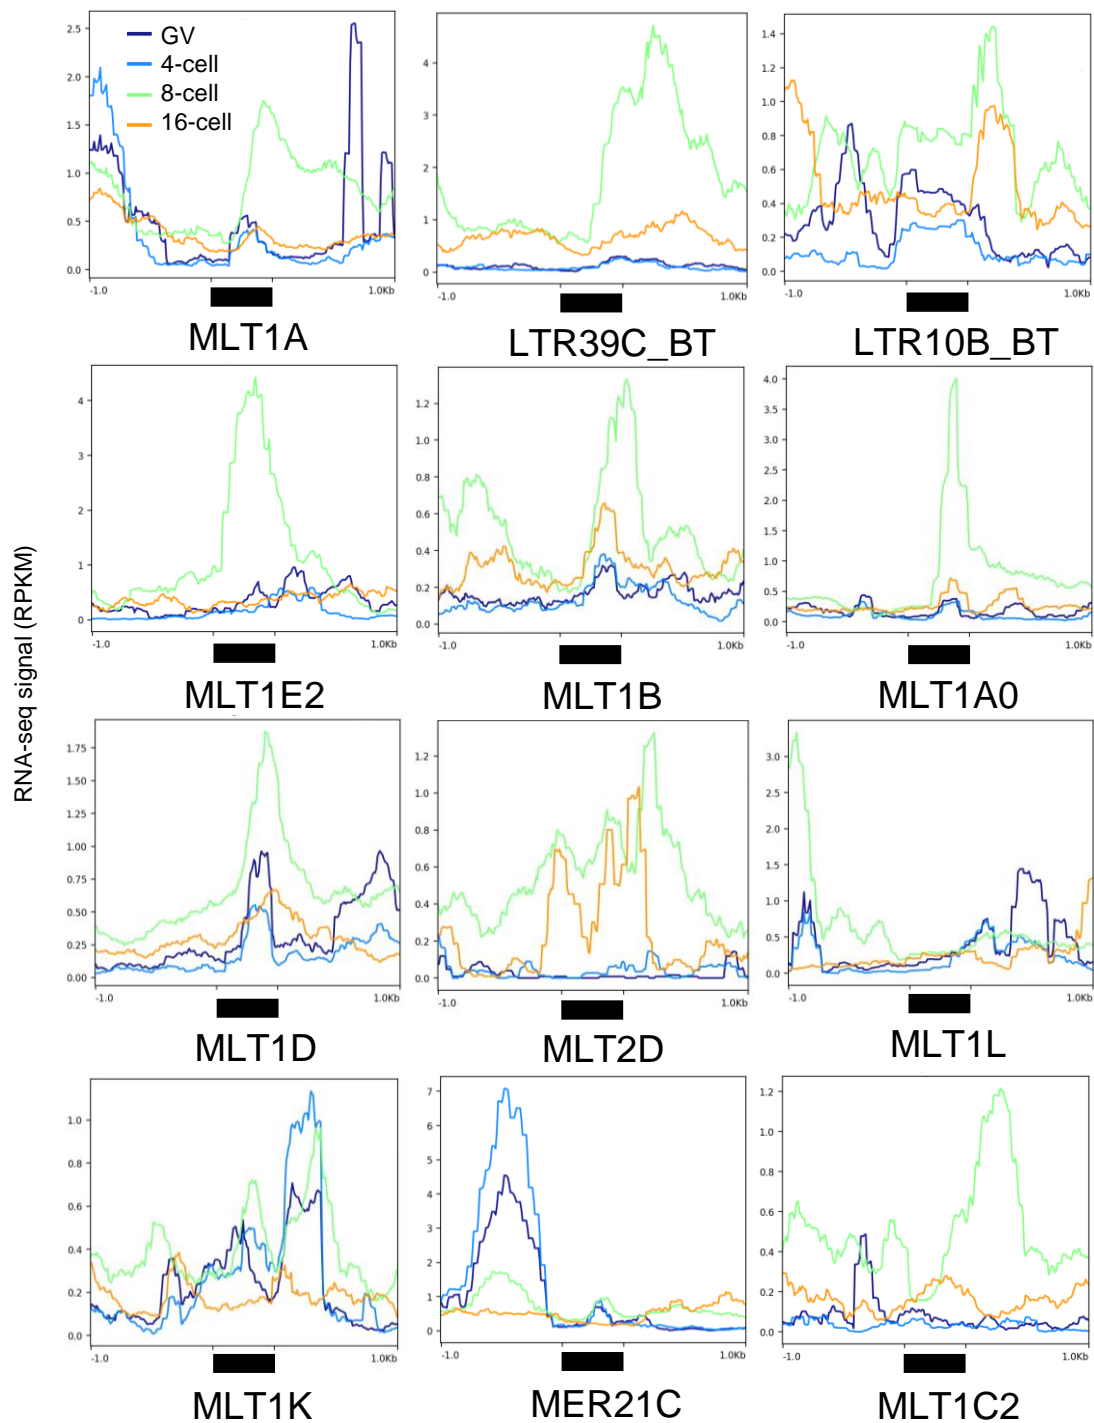

Supplementary Figure 14. Normalized RNA-seq signal (RPKM) at repeats overlapping distal 8-cell ATAC-seq peaks harboring DUXA motifs. RNA-seq from Graf et al (2014) <sup>1</sup>.

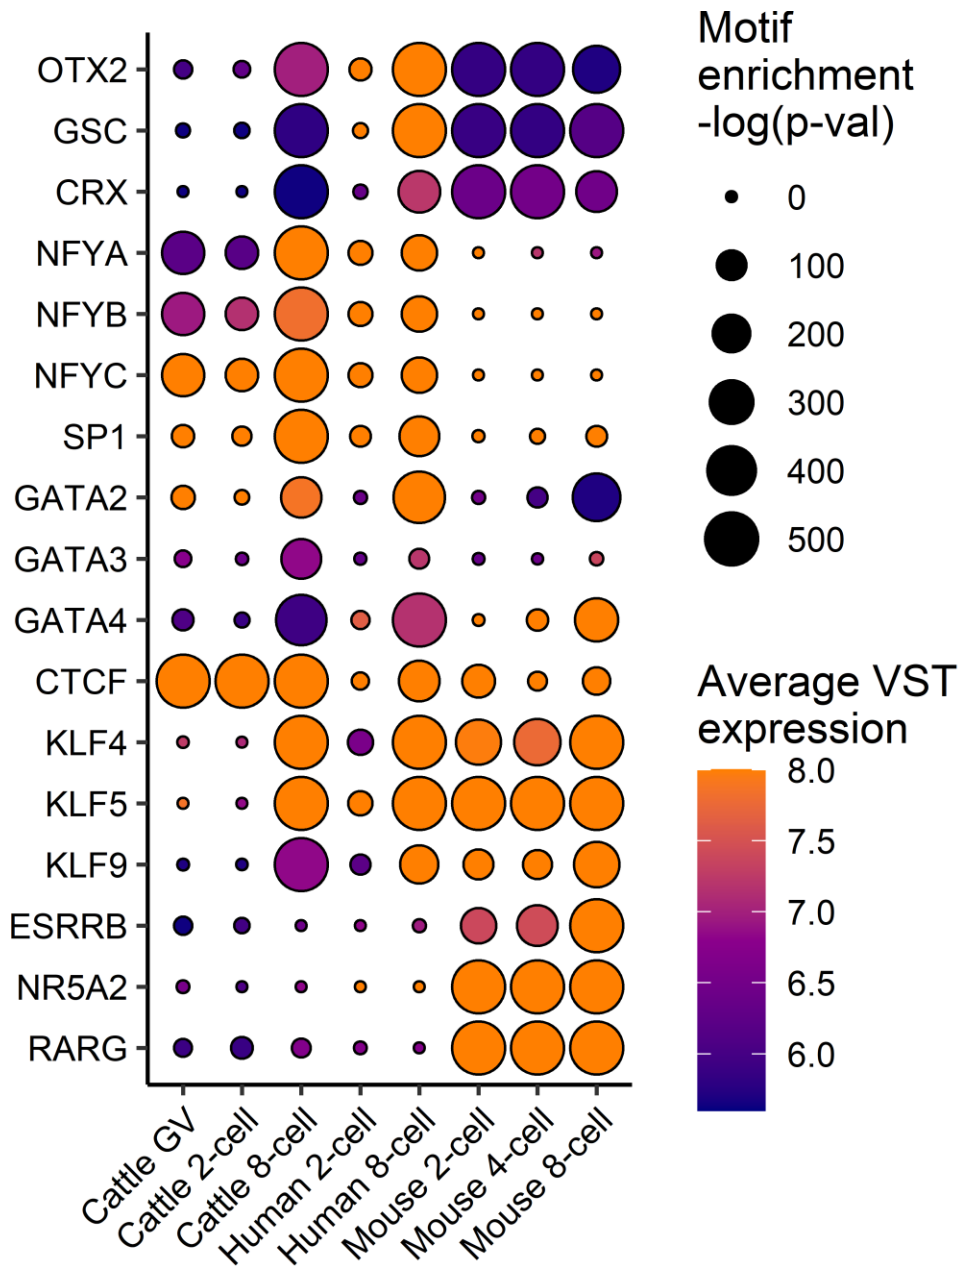

Supplementary Figure 15. Inference of key regulatory factors during preimplantation development in cattle, human, and mouse, based on enrichment for TF binding factors in open chromatin and expression of the corresponding TF. For motif enrichment, binomial test p-values reported. Bovine RNA-seq data from Graf et al (2014) <sup>1</sup>; human ATAC-seq and RNA-seq data from Wu et al (2018) <sup>3</sup>; mouse ATAC-seq and RNA-seq from Wu et al (2016) <sup>4</sup>. Source data are provided as a Source Data file.



Supplementary Table 1. Sequencing depth of individual ATAC-seq libraries. Total raw sequencing reads, percent alignment to the genome (excluding mitochondrial DNA), percent duplication among aligned reads, and informative (non-duplicate, non-mitochondrial uniquely mapping) reads.

| Stage     | Treatment | Rep. | Raw reads   | Aligned reads (%) | Duplicate reads (%) | Informative reads | Total informative reads |
|-----------|-----------|------|-------------|-------------------|---------------------|-------------------|-------------------------|
| GV oocyte | Control   | 1    | 237,846,070 | 56.92             | 90.71               | 7,520,394         | 30,191,548              |
|           |           | 2    | 156,780,590 | 76.35             | 89.22               | 7,597,123         |                         |
|           |           | 3    | 195,336,400 | 68.61             | 83.59               | 15,074,031        |                         |
| 2-cell    | TBE       | 1    | 462,735,044 | 43.21             | 95.96               | 3,649,130         | 19,536,740              |
|           |           | 2    | 67,607,200  | 59.97             | 77.60               | 5,792,638         |                         |
|           |           | 3    | 113,594,712 | 67.41             | 80.08               | 10,094,972        |                         |
| 2-cell    | Control   | 1    | 325,738,800 | 41.47             | 87.54               | 6,944,410         | 31,690,021              |
|           |           | 2    | 284,762,902 | 47.72             | 93.78               | 4,044,907         |                         |
|           |           | 3    | 107,281,710 | 72.97             | 61.13               | 20,700,704        |                         |
| 4-cell    | TBE       | 1    | 758,041,924 | 43.26             | 94.17               | 10,208,325        | 19,198,081              |
|           |           | 2    | 310,266,952 | 54.45             | 94.48               | 4,266,797         |                         |
|           |           | 3    | 51,133,698  | 49.88             | 71.15               | 4,722,959         |                         |
| 4-cell    | Control   | 1    | 744,499,540 | 50.11             | 92.99               | 14,825,045        | 36,653,439              |
|           |           | 2    | 178,231,726 | 57.57             | 76.83               | 14,011,042        |                         |
|           |           | 3    | 280,964,432 | 55.53             | 90.83               | 7,817,352         |                         |
| 8-cell    | TBE       | 1    | 134,460,968 | 91.69             | 58.74               | 36,786,855        | 163,235,550             |
|           |           | 2    | 538,922,446 | 85.69             | 65.42               | 116,170,135       |                         |
|           |           | 3    | 100,844,568 | 50.38             | 71.33               | 10,278,560        |                         |
| 8-cell    | Control   | 1    | 90,270,884  | 91.75             | 40.46               | 38,568,595        | 87,094,541              |
|           |           | 2    | 180,127,326 | 56.53             | 69.97               | 23,632,106        |                         |
|           |           | 3    | 216,383,872 | 52.26             | 71.43               | 24,893,840        |                         |
| Morula    | Control   | 1    | 127,179,516 | 73.94             | 81.43               | 13,744,880        | 64,586,045              |
|           |           | 2    | 160,860,156 | 66.12             | 67.21               | 28,915,042        |                         |
|           |           | 3    | 64,511,504  | 69.71             | 42.24               | 21,926,123        |                         |
| ICM       | Control   | 1    | 100,275,374 | 71.88             | 71.75               | 14,934,364        | 60,254,225              |
|           |           | 2    | 182,505,258 | 67.93             | 83.57               | 13,259,741        |                         |
|           |           | 3    | 152,238,016 | 79.56             | 65.02               | 32,060,120        |                         |
| ESC       | Control   | 1    | 45,150,240  | 45.30             | 68.62               | 5,139,322         | 36,726,659              |
|           |           | 2    | 93,751,520  | 49.43             | 47.97               | 19,658,241        |                         |
|           |           | 3    | 69,528,692  | 48.61             | 55.80               | 11,929,096        |                         |

Supplementary Table 2. Pearson correlation coefficients calculated for replicate ATAC-seq libraries from genome-wide coverage (FPKM in 500 bp windows).

| Stage  | Treatment | Pearson Correlation Coefficient |                 |                 | Average |
|--------|-----------|---------------------------------|-----------------|-----------------|---------|
|        |           | Rep. 1 – Rep. 2                 | Rep. 1 – Rep. 3 | Rep. 2 – Rep. 3 |         |
| GV     | Control   | 0.97                            | 0.97            | 0.97            | 0.97    |
| 2-cell | Control   | 0.99                            | 0.97            | 0.96            | 0.97    |
| 4-cell | Control   | 0.98                            | 0.98            | 0.99            | 0.98    |
| 8-cell | Control   | 0.79                            | 0.84            | 0.98            | 0.87    |
| Morula | Control   | 0.93                            | 0.95            | 0.96            | 0.95    |
| ICM    | Control   | 0.94                            | 0.94            | 0.88            | 0.92    |
| ESC    | Control   | 0.92                            | 0.97            | 0.97            | 0.95    |
| 2-cell | TBE       | 0.98                            | 0.97            | 0.98            | 0.98    |
| 4-cell | TBE       | 1.00                            | 0.99            | 0.99            | 0.99    |
| 8-cell | TBE       | 0.90                            | 0.76            | 0.73            | 0.80    |

Supplementary Table 3. Top five de novo enriched motifs found in intergenic ATAC-seq peaks that were either unique to GV oocytes or gained between stages of development. Matching known motifs (log odds match score > 0.6) reported for each de novo motif. Binomial test p-values reported (all FDR adjusted Q-values < 1e-4).

|                                    | Rank | Matching known motifs                                    | P-value | Loci with motif (%) | Background (%) |
|------------------------------------|------|----------------------------------------------------------|---------|---------------------|----------------|
| Peaks unique to GV oocytes         | 1    | RFX4, RFX5, RFXDC2, RFX3, RFX1, RFX2                     | 1e-191  | 23.83               | 15.93          |
|                                    | 2    | ZNF519, CRZ1, EGR3, EGR2, PITX1                          | 1e-168  | 7.87                | 3.73           |
|                                    | 3    | No known matches                                         | 1e-157  | 6.50                | 2.91           |
|                                    | 4    | AP4, PTF1A, E2A, FIGLA, ASCL1, TCF21, TCF3, TCF12        | 1e-131  | 27.40               | 20.34          |
|                                    | 5    | ZBTB3, POU6F1                                            | 1e-114  | 3.59                | 1.39           |
| Peaks gained from 2- to 4-cell     | 1    | BORIS, CTCF, SP4, ZIC1, ZIC4                             | 1e-830  | 5.01                | 0.80           |
|                                    | 2    | NFkB-p65, NFkB2, REL, NFkB-p50,p52, RELA, NFkB1          | 1e-132  | 10.49               | 7.04           |
|                                    | 3    | ZFP128, PLAGL1, ZNF354C, ZNF263, CRX, FOXH1              | 1e-126  | 0.22                | 0.00           |
|                                    | 4    | NKX3-1, ISL2, NKX3-2                                     | 1e-113  | 0.24                | 0.01           |
|                                    | 5    | ZFP691, ZNF263, MED1, SOX8, ZBTB3                        | 1e-109  | 0.95                | 0.22           |
| Peaks gained from 4- to 8-cell     | 1    | DUX4, CRX, DMBX1, PITX1, PITX3, PAX7, GSC                | 1e-5781 | 35.17               | 9.81           |
|                                    | 2    | KLF5, KLF4, KLF1, GC-box, KLF14, KLF7, SP3               | 1e-1687 | 14.52               | 4.81           |
|                                    | 3    | NFYB, NFY, CCAAT-box, NFYA, DUX                          | 1e-1543 | 11.57               | 3.44           |
|                                    | 4    | EWS-ERG, HOXC9, POU6F2                                   | 1e-1253 | 2.43                | 0.12           |
|                                    | 5    | RORgt, RORA                                              | 1e-999  | 1.90                | 0.09           |
| Peaks gained from 8-cell to morula | 1    | KLF4, KLF5, KLF1, KLF7, GC-box, SP3, KLF14               | 1e-1375 | 20.21               | 9.84           |
|                                    | 2    | GATA4, GATA3, GATA5, GATA2, GATA1, GATA6                 | 1e-1194 | 30.59               | 18.60          |
|                                    | 3    | CRX, OTX2, PITX3, PITX1, GSC, DMBX1, PITX2, OBOX6        | 1e-878  | 15.11               | 7.72           |
|                                    | 4    | AP-2gamma, AP-2alpha, TFAP2E, TFAP2C, TFAP2A, TFAP2B     | 1e-864  | 15.85               | 8.32           |
|                                    | 5    | BORIS, CTCF, SP4, ZIC1, ZIC4                             | 1e-736  | 4.03                | 1.03           |
| Peaks gained from morula to ICM    | 1    | JUN-AP1, ATF3, AP1, JUNB, FOSL2, FOSL1, BATF, FRA1, JUND | 1e-773  | 18.76               | 4.30           |
|                                    | 2    | GATA4, GATA5, GATA2, GATA1                               | 1e-370  | 22.10               | 9.59           |
|                                    | 3    | EKLF, KLF1, KLF5, KLF4, KLF10, KLF9, SP3                 | 1e-101  | 15.25               | 9.21           |
|                                    | 4    | No known matches                                         | 1e-98   | 0.51                | 0.01           |
|                                    | 5    | NKX2.2, GFX, ZBTB22, NKX2-1                              | 1e-89   | 0.61                | 0.02           |
| Peaks gained from ICM to ESC       | 1    | SOX3, SOX10, SOX6, SOX15, SOX2, SOX14                    | 1e-1053 | 24.16               | 13.74          |
|                                    | 2    | BORIS, CTCF, ZIC4, ZIC1                                  | 1e-895  | 11.62               | 5.10           |
|                                    | 3    | TEAD3, TEAD1, TEAD4, TEAD, TEAD2                         | 1e-610  | 7.66                | 3.26           |
|                                    | 4    | ZIC1, ZIC3, ZIC2, ZIC, TCF21                             | 1e-356  | 13.60               | 8.71           |
|                                    | 5    | TGIF1, MEIS1, MEIS2, TGIF1, MEIS3                        | 1e-338  | 48.99               | 41.18          |

Supplementary Table 4. Functional enrichment of genes with promoters marked by open chromatin containing specific TF footprints. Gene ontology listed in order of significance.

| Stage  | TF family | Peaks with footprints | Marked promoters                                                                                                                 | Enriched gene ontology terms (FDR < 0.001)                                                                                                                                                                                                                                                                                                                                                                                                                                                                                                                                                                                                                                                                                                                                                                                                                                                                                                  |
|--------|-----------|-----------------------|----------------------------------------------------------------------------------------------------------------------------------|---------------------------------------------------------------------------------------------------------------------------------------------------------------------------------------------------------------------------------------------------------------------------------------------------------------------------------------------------------------------------------------------------------------------------------------------------------------------------------------------------------------------------------------------------------------------------------------------------------------------------------------------------------------------------------------------------------------------------------------------------------------------------------------------------------------------------------------------------------------------------------------------------------------------------------------------|
| GV     | CTCF      | 7819                  | 1747                                                                                                                             | None                                                                                                                                                                                                                                                                                                                                                                                                                                                                                                                                                                                                                                                                                                                                                                                                                                                                                                                                        |
|        | NFYs      | 5,242                 | 2,043                                                                                                                            | protein binding, cell division, mitotic nuclear division, positive regulation of transcription (DNA-templated), negative regulation of nucleic acid-templated transcription                                                                                                                                                                                                                                                                                                                                                                                                                                                                                                                                                                                                                                                                                                                                                                 |
|        | RFXs      | 5740                  | 1213                                                                                                                             | protein binding, cilium assembly                                                                                                                                                                                                                                                                                                                                                                                                                                                                                                                                                                                                                                                                                                                                                                                                                                                                                                            |
| 4-cell | CTCF      | 6,754                 | 1,434                                                                                                                            | None                                                                                                                                                                                                                                                                                                                                                                                                                                                                                                                                                                                                                                                                                                                                                                                                                                                                                                                                        |
|        | KLFs      | 23,920                | 7,494                                                                                                                            | protein binding, ATP binding, poly(A) RNA binding, protein serine/threonine kinase activity, cadherin binding involved in cell-cell adhesion, protein transport, cell-cell adhesion, protein phosphorylation, identical protein binding, protein complex binding, transcription coactivator activity, chromatin binding, intracellular protein transport                                                                                                                                                                                                                                                                                                                                                                                                                                                                                                                                                                                    |
|        | NFKBs     | 7,392                 | 1,541                                                                                                                            | Negative regulation of cell differentiation, negative regulation of transcription (DNA-templated), protein binding, poly(A) RNA binding                                                                                                                                                                                                                                                                                                                                                                                                                                                                                                                                                                                                                                                                                                                                                                                                     |
|        | NFYs      | 3,620                 | 1,667                                                                                                                            | protein binding, negative regulation of cell differentiation, cell division, mitotic nuclear division, ATP binding, G2/M transition of mitotic cell cycle                                                                                                                                                                                                                                                                                                                                                                                                                                                                                                                                                                                                                                                                                                                                                                                   |
|        | SPs       | 23,405                | 8,135                                                                                                                            | protein binding, poly(A) RNA binding, ATP binding, protein serine/threonine kinase activity, protein phosphorylation, cell division, protein transport, negative regulation of transcription (DNA-templated), chromatin binding, cadherin binding involved in cell-cell adhesion, ubiquitin-protein transferase activity, identical protein binding, mitotic nuclear division, protein kinase activity, covalent chromatin modification, cell-cell adhesion, cell cycle, positive regulation of transcription (DNA-templated), ubiquitin protein ligase binding, intracellular protein transport, ligase activity, protein ubiquitination                                                                                                                                                                                                                                                                                                   |
| 8-cell | CTCF      | 8,123                 | 1,447                                                                                                                            | protein binding                                                                                                                                                                                                                                                                                                                                                                                                                                                                                                                                                                                                                                                                                                                                                                                                                                                                                                                             |
|        | DUXs      | 20,402                | 2,029                                                                                                                            | protein binding, negative regulation of cell differentiation, negative regulation of transcription (DNA-templated), poly(A) RNA-binding, cell division, mRNA splicing via spliceosome, ATP binding                                                                                                                                                                                                                                                                                                                                                                                                                                                                                                                                                                                                                                                                                                                                          |
|        | GSCs      | 9,242                 | 744                                                                                                                              | negative regulation of cell differentiation                                                                                                                                                                                                                                                                                                                                                                                                                                                                                                                                                                                                                                                                                                                                                                                                                                                                                                 |
|        | KLFs      | 31,229                | 7,582                                                                                                                            | protein binding, poly(A) RNA binding, ATP binding, cell division, protein serine/threonine kinase activity, intracellular protein transport, cadherin involved in cell-cell adhesion, mitotic nuclear division, cell-cell adhesion, protein phosphorylation, protein transport                                                                                                                                                                                                                                                                                                                                                                                                                                                                                                                                                                                                                                                              |
|        | NFYs      | 10,402                | 2,225                                                                                                                            | protein binding, cell division, negative regulation of cell differentiation, nucleosome assembly, negative regulation of transcription (DNA-templated), ATP binding, unfolded protein binding                                                                                                                                                                                                                                                                                                                                                                                                                                                                                                                                                                                                                                                                                                                                               |
|        | OTXs      | 9,930                 | 823                                                                                                                              | negative regulation of cell differentiation                                                                                                                                                                                                                                                                                                                                                                                                                                                                                                                                                                                                                                                                                                                                                                                                                                                                                                 |
|        | PITXs     | 13,038                | 883                                                                                                                              | negative regulation of cell differentiation                                                                                                                                                                                                                                                                                                                                                                                                                                                                                                                                                                                                                                                                                                                                                                                                                                                                                                 |
|        | SPs       | 28,080                | 8,062                                                                                                                            | protein binding, poly(A) RNA binding, ATP binding, cell division, protein serine/ threonine kinase activity, cadherin binding involved in cell-cell adhesion, mitotic nuclear division, chromatin binding, transcription coactivator activity, kinase activity, ligase activity, DNA repair, cell-cell adhesion, regulation of cell cycle, cell cycle, protein kinase activity, negative regulation of transcription (DNA-templated), intracellular protein transport, protein phosphorylation, magnesium ion binding, SH3 domain binding, G1/S transition of mitotic cell cycle, transcription initiation from RNA polymerase II promoter, protein transport, regulation of signal transduction by p53 class mediator, protein dephosphorylation, protein complex binding                                                                                                                                                                  |
| ZSCAN4 | 3,148     | 544                   | Negative regulation of cell differentiation, positive regulation of cell proliferation, negative regulation of apoptotic process |                                                                                                                                                                                                                                                                                                                                                                                                                                                                                                                                                                                                                                                                                                                                                                                                                                                                                                                                             |
| Morula | CTCF      | 12,946                | 1,619                                                                                                                            | None                                                                                                                                                                                                                                                                                                                                                                                                                                                                                                                                                                                                                                                                                                                                                                                                                                                                                                                                        |
|        | GATAs     | 19,238                | 1,031                                                                                                                            | negative regulation of cell differentiation                                                                                                                                                                                                                                                                                                                                                                                                                                                                                                                                                                                                                                                                                                                                                                                                                                                                                                 |
|        | KLFs      | 58,804                | 9,119                                                                                                                            | protein binding, ATP binding, poly(A) RNA binding, cadherin binding involved in cell-cell adhesion, identical protein binding, cell-cell adhesion, protein serine/threonine kinase activity                                                                                                                                                                                                                                                                                                                                                                                                                                                                                                                                                                                                                                                                                                                                                 |
|        | SPs       | 52,905                | 9,658                                                                                                                            | protein binding, poly(A) RNA binding, ATP binding, negative regulation of transcription (DNA-templated), protein serine/threonine kinase activity, cadherin binding involved in cell-cell adhesion, covalent chromatin modification, identical protein binding, kinase activity, cell-cell adhesion, positive regulation of transcription (DNA-templated), G1/S transition of mitotic cell cycle, ligase activity, vesicle-mediated transport, transcription coactivator activity, protein transport,, chromatin binding, protein phosphorylation, ubiquitin protein ligase binding, protein kinase binding, Wnt signaling pathway                                                                                                                                                                                                                                                                                                          |
|        | CTCF      | 9,099                 | 1,832                                                                                                                            | None                                                                                                                                                                                                                                                                                                                                                                                                                                                                                                                                                                                                                                                                                                                                                                                                                                                                                                                                        |
| ICM    | GATAs     | 12,136                | 966                                                                                                                              | negative regulation of cell differentiation, negative regulation of apoptotic process, negative regulation of transcription (DNA-templated)                                                                                                                                                                                                                                                                                                                                                                                                                                                                                                                                                                                                                                                                                                                                                                                                 |
|        | JUNs      | 20,609                | 2,860                                                                                                                            | protein binding, negative regulation of cell differentiation, cell-cell adhesion                                                                                                                                                                                                                                                                                                                                                                                                                                                                                                                                                                                                                                                                                                                                                                                                                                                            |
|        | KLFs      | 36,422                | 10,510                                                                                                                           | protein binding, poly(A) RNA binding, ATP binding, cadherin binding involved in cell-cell adhesion, protein serine/threonine kinase activity, cell-cell adhesion, negative regulation of transcription (DNA-templated), magnesium ion binding, identical protein binding, enzyme binding, protein phosphorylation, positive regulation of transcription (DNA-templated), negative regulation of transcription from RNA polymerase II promoter, positive regulation of transcription from RNA polymerase II promoter, protein transport, small GTPase mediated signal transduction, protein kinase binding                                                                                                                                                                                                                                                                                                                                   |
|        | SPs       | 34,768                | 11,363                                                                                                                           | protein binding, poly(A) RNA binding, protein serine/threonine kinase activity, ATP binding, cadherin binding involved in cell-cell adhesion, positive regulation of transcription (DNA-templated), identical protein binding, positive regulation from RNA polymerase II promoter, protein phosphorylation, cell-cell adhesion, transcription coactivator activity, protein kinase binding, negative regulation of transcription from RNA polymerase II promoter, covalent chromatin modification, protein phosphorylation, negative regulation of transcription from RNA polymerase II promoter, covalent chromatin modification, protein autophosphorylation, negative regulation of transcription (DNA-templated), protein transport, intracellular signal transduction, G1/S transition of mitotic cell cycle, magnesium ion binding, protein kinase activity, small GTPase mediated signal transduction, transcription factor binding |

Supplementary Table 5. Top enriched known motifs in ATAC-seq peaks that appeared at the 2-cell, 4-cell, or 8-cell stages, and which persisted up the morula stage. Binomial test p-values reported (all FDR adjusted Q-values < 1e-4).

|                                     | Motif  | P-value | Peaks with motif (%) |
|-------------------------------------|--------|---------|----------------------|
| Maintained 2-cell<br>ATAC-seq peaks | NFY    | 1e-306  | 31.47                |
|                                     | CTCF   | 1e-158  | 13.54                |
|                                     | SP1    | 1e-152  | 41.11                |
|                                     | GFX    | 1e-126  | 4.15                 |
|                                     | ETS    | 1e-109  | 21.62                |
|                                     | ELK1   | 1e-98   | 34.47                |
|                                     | ZBTB33 | 1e-98   | 8.28                 |
| Maintained 4-cell<br>ATAC-seq peaks | CTCF   | 1e-2586 | 27.26                |
|                                     | BORIS  | 1e-1571 | 34.77                |
|                                     | SP1    | 1e-229  | 29.07                |
|                                     | NFY    | 1e-215  | 23.77                |
|                                     | ETS    | 1e-167  | 16.72                |
|                                     | KLF9   | 1e-156  | 27.69                |
|                                     | NRF1   | 1e-147  | 12.95                |
| Maintained 8-cell<br>ATAC-seq peaks | OTX2   | 1e-4190 | 45.31                |
|                                     | GSC    | 1e-3882 | 55.26                |
|                                     | CTCF   | 1e-2287 | 10.24                |
|                                     | KLF5   | 1e-1782 | 37.45                |
|                                     | CRX    | 1e-1758 | 71.94                |
|                                     | PHOX2A | 1e-1734 | 24.04                |
|                                     | KLF4   | 1e-1595 | 15.48                |

Supplementary Table 6. Retrotransposon enrichment in 8-cell intergenic ATAC-seq peaks harboring DUXA motifs (n=16,804 loci). Retrotransposons that appeared in at least 100 ATAC-seq peaks are reported.

| Repeat    | Distal 8-cell peaks<br>with DUXA motif | Background | Log ratio random to<br>observed |
|-----------|----------------------------------------|------------|---------------------------------|
| MLT1A     | 507                                    | 32         | 2.763                           |
| LTR39C_BT | 125                                    | 14         | 2.189                           |
| LTR10B_BT | 239                                    | 28         | 2.144                           |
| MLT1E2    | 101                                    | 16         | 1.843                           |
| MLT1B     | 404                                    | 67         | 1.797                           |
| MLT1A0    | 443                                    | 74         | 1.790                           |
| MLT1D     | 512                                    | 87         | 1.772                           |
| MLT2D     | 108                                    | 19         | 1.738                           |
| MLT1L     | 185                                    | 34         | 1.694                           |
| MLT1K     | 311                                    | 58         | 1.679                           |
| MER21C    | 150                                    | 45         | 1.204                           |
| MLT1C2    | 197                                    | 65         | 1.109                           |

Supplementary Table 7. Sequences of primers used for PCR amplification of ATAC-seq libraries. Primer names beginning with “2” contain indexes used for demultiplexing.

| Primer | Sequence (5' to 3')                                    |
|--------|--------------------------------------------------------|
| 1      | AATGATACGGCGACCACCGAGATCTACACTCGTCGGCAGCGTCAGATGTG     |
| 2A     | CAAGCAGAAGACGGCATAACGAGATCTAGTACGGTCTCGTGGGCTCGGAGATGT |
| 2B     | CAAGCAGAAGACGGCATAACGAGATTTCTGCCTGTCTCGTGGGCTCGGAGATGT |
| 2C     | CAAGCAGAAGACGGCATAACGAGATGCTCAGGAGTCTCGTGGGCTCGGAGATGT |
| 2D     | CAAGCAGAAGACGGCATAACGAGATAGGAGTCCGTCTCGTGGGCTCGGAGATGT |
| 2E     | CAAGCAGAAGACGGCATAACGAGATCATGCCTAGTCTCGTGGGCTCGGAGATGT |
| 2F     | CAAGCAGAAGACGGCATAACGAGATGTAGAGAGGTCTCGTGGGCTCGGAGATGT |
| 2G     | CAAGCAGAAGACGGCATAACGAGATCCTCTCTGGTCTCGTGGGCTCGGAGATGT |
| 2H     | CAAGCAGAAGACGGCATAACGAGATAGCGTAGCGTCTCGTGGGCTCGGAGATGT |
| 2I     | CAAGCAGAAGACGGCATAACGAGATCAGCCTCGGTCTCGTGGGCTCGGAGATGT |
| 2J     | CAAGCAGAAGACGGCATAACGAGATTGCCTCTTGTCTCGTGGGCTCGGAGATGT |
| 2K     | CAAGCAGAAGACGGCATAACGAGATTCTCTACGTCTCGTGGGCTCGGAGATGT  |
| 2L     | CAAGCAGAAGACGGCATAACGAGATATCACGACGTCTCGTGGGCTCGGAGATGT |
| 2M     | CAAGCAGAAGACGGCATAACGAGATACAGTGGTGTCTCGTGGGCTCGGAGATGT |
| 2N     | CAAGCAGAAGACGGCATAACGAGATCAGATCCAGTCTCGTGGGCTCGGAGATGT |
| 2O     | CAAGCAGAAGACGGCATAACGAGATACAAACGGGTCTCGTGGGCTCGGAGATGT |
| 2P     | CAAGCAGAAGACGGCATAACGAGATACCCAGCAGTCTCGTGGGCTCGGAGATGT |
| 2Q     | CAAGCAGAAGACGGCATAACGAGATAACCCCTCGTCTCGTGGGCTCGGAGATGT |
| 2R     | CAAGCAGAAGACGGCATAACGAGATCCCAACCTGTCTCGTGGGCTCGGAGATGT |
| 2S     | CAAGCAGAAGACGGCATAACGAGATCACACACGTCTCGTGGGCTCGGAGATGT  |
| 2T     | CAAGCAGAAGACGGCATAACGAGATGAAACCCAGTCTCGTGGGCTCGGAGATGT |
| 2U     | CAAGCAGAAGACGGCATAACGAGATTGTGACCAGTCTCGTGGGCTCGGAGATGT |
| 2V     | CAAGCAGAAGACGGCATAACGAGATAGGGTCAAGTCTCGTGGGCTCGGAGATGT |
| 2W     | CAAGCAGAAGACGGCATAACGAGATAGGAGTGGGTCTCGTGGGCTCGGAGATGT |
| 2X     | CAAGCAGAAGACGGCATAACGAGATTGCCTTAGTCTCGTGGGCTCGGAGATGT  |

## Supplementary References

1. Graf, A. et al. Fine mapping of genome activation in bovine embryos by RNA sequencing. *Proc. Natl. Acad. Sci.* 111, 4139 LP – 4144 (2014).
2. Bogliotti, Y. S. et al. Transcript profiling of bovine embryos implicates specific transcription factors in the maternal-to-embryo transition. *Biol. Reprod.* (2019) doi:10.1093/biolre/ioz209.
3. Wu, J. et al. Chromatin analysis in human early development reveals epigenetic transition during ZGA. (2018) doi:10.1038/s41586-018-0080-8.
4. Wu, J. et al. The landscape of accessible chromatin in mammalian preimplantation embryos. *Nature* 534, 652–657 (2016).
